# Supplementary material for: The contributions and mechanisms of iron-microbes-biochar in constructed wetlands for nitrate removal from low carbon/nitrogen ratio wastewater
Source: Royal Society of Chemistry journal article supplement (doi:10.1039/d0ra03609a), 2020-01-01
Supplement: d0ra03609a1.pdf [file d0ra03609a1.pdf]

The contributions and mechanisms of iron-microbes-biochar in  
constructed wetlands for nitrate removal from low carbon/nitrogen ratio  
wastewater

Jian Xu<sup>ab</sup>, Xiawei Liu<sup>ab</sup>, Jiaolong Huang<sup>ab</sup>, Manqi Huang<sup>ab</sup>, Tao Wang<sup>ab</sup>, Shaopan  
Bao<sup>a</sup>, Wei Tang<sup>a</sup>, Tao Fang<sup>□ab</sup>

<sup>a</sup> Institute of Hydrobiology, Chinese Academy of Sciences, Wuhan 430072, China

<sup>b</sup> University of Chinese Academy of Sciences, Beijing 100049, China

\*Corresponding Author: Tao Fang, Institute of Hydrobiology, Chinese Academy of  
Sciences, No. 7 Donghu South Road, Wuchang District, Wuhan, China 430072.

Tel: (86) 6878-0995, Fax: (86) 6878-0995

E-mail: fangt@ihb.ac.cn

| Parameter                                | Value |
|------------------------------------------|-------|
| TN (mg N/L)                              | 8.92  |
| NO <sub>3</sub> <sup>-</sup> -N (mg N/L) | 3.44  |
| NO <sub>2</sub> <sup>-</sup> -N (mg N/L) | 0.09  |
| NH <sub>4</sub> <sup>+</sup> -N (mg N/L) | 5.24  |
| COD <sub>cr</sub> (mg/L)                 | 22.29 |
| Dissolved Oxygen (mg/L)                  | 5.37  |
| PH                                       | 7.29  |

**Table S1** Water quality of the effluent from sewage treatment plant

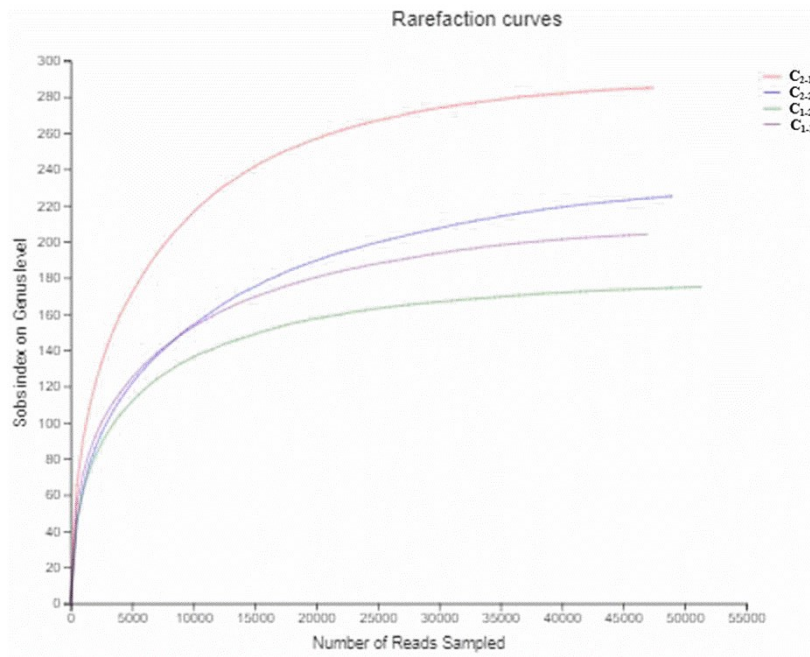

**Fig. S1.** Rarefaction curves based on Illumina Sequencing in four different samples.
